1 **The cellular response towards lanthanum is substrate**  
2 **specific and reveals a novel route for glycerol metabolism in**  
3 ***Pseudomonas putida* KT2440**

4 Matthias Wehrmann<sup>a</sup>, Maxime Toussaint<sup>b,c</sup>, Jens Pfannstiel<sup>d</sup>, Patrick Billard<sup>b,c#</sup>,  
5 Janosch Klebensberger<sup>a#</sup>

6  
7 *<sup>a</sup>University of Stuttgart, Institute of Biochemistry and Technical Biochemistry,*  
8 *Department of Technical Biochemistry, Stuttgart, Germany*

9  
10 *<sup>b</sup>Université de Lorraine, LIEC UMR7360, Faculté des Sciences et Technologies,*  
11 *Vandoeuvre-lès-Nancy, France*

12  
13 *<sup>c</sup>CNRS, LIEC UMR7360, Faculté des Sciences et Technologies, Vandoeuvre-lès-*  
14 *Nancy, France*

15  
16 *<sup>d</sup>Core Facility Hohenheim, Mass Spectrometry Module, University of Hohenheim,*  
17 *August von Hartmann-Str. 3, 70599 Stuttgart, Germany*

18  
19 Running title: Conditional responses of *Pseudomonas putida* towards rare earth  
20 elements

21  
22 #Address correspondence to Janosch Klebensberger

23 ([janosch.klebensberger@itb.uni-stuttgart.de](mailto:janosch.klebensberger@itb.uni-stuttgart.de)) and Patrick Billard ([patrick.billard@univ-](mailto:patrick.billard@univ-lorraine.fr)  
24 [lorraine.fr](mailto:patrick.billard@univ-lorraine.fr))

25

- 26 Keywords: Lanthanides, rare earth elements, proteome, glycerol metabolism,
- 27 *Pseudomonas putida*, PQQ, PedE, PedH, Gark, dehydrogenases

## 28 **Abstract**

29 Ever since the discovery of the first rare earth element (REE)-dependent enzyme, the  
30 physiological role of lanthanides has become an emerging field of research due to the potential  
31 environmental implications and biotechnological opportunities. In *Pseudomonas putida*  
32 KT2440, the two pyrroloquinoline quinone-dependent alcohol dehydrogenases (PQQ-ADHs)  
33 PedE and PedH are inversely produced in response to La<sup>3+</sup>-availability. This REE-switch is  
34 orchestrated by a complex regulatory network including the PedR2/PedS2 two-component  
35 system and is important for efficient growth on several alcoholic volatiles. As *P. putida* is  
36 exposed to a broad variety of organic compounds in its natural soil habitat, the cellular  
37 responses towards La<sup>3+</sup> during growth on various carbon and energy sources were  
38 investigated with a differential proteomic approach. Apart from the Ca<sup>2+</sup>-dependent enzyme  
39 PedE, the differential abundance of most other identified proteins was conditional and revealed  
40 a substrate specificity. Concomitant with the proteomic changes, La<sup>3+</sup> had a beneficial effect  
41 on lag-phases while causing reduced growth rates and lower optical densities in stationary  
42 phase during growth on glycerol. When these growth phenotypes were evaluated with mutant  
43 strains, a novel metabolic route for glycerol utilization was identified that seems to be functional  
44 in parallel with the main degradation pathway encoded by the *glpFKRD* operon. The newly  
45 discovered route is initiated by PedE and/or PedH, which most likely convert glycerol to  
46 glyceraldehyde. In the presence of lanthanum, glyceraldehyde seems to be further oxidized to  
47 glycerate, which, upon phosphorylation to glycerate-2-phosphate by the glycerate kinase  
48 GarK, is finally channelled into the central metabolism.

## 49 **Importance**

50 The biological role of rare earth elements has long been underestimated and research has  
51 mainly focused on methanotrophic bacteria. We have recently demonstrated that *P. putida*, a  
52 plant growth promoting bacterium that thrives in the rhizosphere of various feed crops,  
53 possesses a REE-dependent alcohol dehydrogenase (PedH), but knowledge about  
54 lanthanide-dependent effects on physiological traits in non-methylotrophic bacteria is still  
55 scarce. This study demonstrates that the cellular response of *P. putida* KT2440 towards  $\text{La}^{3+}$   
56 is mostly substrate specific and that during growth on glycerol,  $\text{La}^{3+}$  has a severe effect on  
57 growth parameters. We provide compelling evidence that the observed physiological changes  
58 are linked to the catalytic activity of PedH and thereby identify a novel route for glycerol  
59 metabolism in this biotechnological relevant organism. Overall, these findings demonstrate that  
60 lanthanides can alter important physiological traits of non-methylotrophic bacteria, which might  
61 consequently influence their competitiveness during colonization of various environmental  
62 niches.

## 63 Introduction

64 The rhizosphere, defined as the narrow region of soil surrounding plant roots, is one of the  
65 most complex ecosystems on earth containing a multitude of organisms from different taxa  
66 including fungi, oomycetes, nematodes, protozoa, algae, viruses, archaea and arthropods as  
67 well as up to  $10^8$  soil dwelling bacteria per gram of fresh root (1–3). Its diversity is mainly  
68 shaped by root exudates, a complex mixture of organic compounds including carbohydrates,  
69 amino acids, or carbon acids (4, 5) and plant-, fungal-, and bacteria-derived volatiles (VOCs)  
70 such as alkenes, alcohols, terpenes or benzenoids (6, 7). As such, it is not surprising that the  
71 soil-dwelling organism *P. putida* KT2440 is equipped with a broad diversity of metabolic  
72 pathways in order to maximize its cellular fitness in different environmental niches including  
73 the rhizosphere (8–10). For efficient growth on various alcoholic VOC substrates, it uses a  
74 periplasmic oxidation system consisting of the pyrroloquinoline quinone-dependent alcohol  
75 dehydrogenases (PQQ-ADHs) PedE and PedH (11, 12). The enzymes appear to be  
76 functionally redundant but differ in their metal cofactor dependency. PedE is a  $\text{Ca}^{2+}$ -dependent  
77 enzyme, whereas PedH requires the presence of rare earth elements (REEs) of the lanthanide  
78 series ( $\text{Ln}^{3+}$ ) for catalytic activity (12, 13).

79 Although being among the most ubiquitous metals in the earth's crust, REEs were long  
80 considered to be of no biological relevance due to their low solubility under environmental  
81 conditions (14). Indeed, the only known and characterized REE-dependent enzymes thus far  
82 belong to the family of PQQ-ADHs of methano- and methylotrophic bacteria as well as the non-  
83 methylotrophic organism *P. putida* KT2440 (12, 15–20). A characteristic aspartic acid that is  
84 additionally present in the metal coordination sphere of these enzymes is associated with  $\text{Ln}^{3+}$ -  
85 binding. Notably, this specific amino acid residue has been found in the genome of many  
86 bacteria from various origins indicating a broad distribution of  $\text{Ln}^{3+}$ -dependent enzymes (21–  
87 25). Very recently, another  $\text{Ln}^{3+}$ -binding protein, called lanmodulin, was identified in *M.*  
88 *extorquens* AM1 (26). This periplasmic protein, which shows structural similarities with the  
89  $\text{Ca}^{2+}$ -binding protein calmodulin, is able to bind up to four  $\text{Ln}^{3+}$  ions per protein with picomolar  
90 affinity and changes its conformation from a largely disordered to a compact, ordered state

91 upon REE binding. Although its exact cellular role has yet to be established, it has been  
92 speculated to play a role in  $\text{Ln}^{3+}$ -uptake. Further, homologous genes have only been identified  
93 in the genome of some other species of *Methylobacteria* and *Bradyrhizobia*.

94 In addition to their functional role as metal cofactor, several studies have recently investigated  
95 the effect of REEs on cellular physiology in different methano- and methylotrophic organisms  
96 (20, 27–32). Some of these studies found different physiological traits to be influenced in  
97 response to  $\text{Ln}^{3+}$ -availability including changes in metabolite cross-feeding, growth rates and -  
98 yields, or biofilm formation. It is further interesting to note that REEs have been used as micro-  
99 fertilizers, especially in China, for over 30 years, as  $\text{Ln}^{3+}$ -supplementation can be associated  
100 with increased growth of different food crops including rice, mungbean, maize, and coconut  
101 plants (33–37).

102 The aforementioned results suggest that apart from the inverse transcriptional regulation of  
103 PQQ-ADHs, which has been described in detail for different organisms including *P. putida* (12,  
104 19, 27, 38–42), additional responses towards REEs exist and could depend on the specific  
105 organism and/or environmental context. To investigate the existence of such conditional  
106 cellular responses in the non-methylotrophic organism *P. putida* KT2440, we used a differential  
107 proteomic approach during growth on various carbon and energy sources that reflect the  
108 metabolic diversity of the rhizosphere. From these experiments, we found that the  $\text{Ca}^{2+}$ -  
109 dependent PQQ-ADH PedE was the only protein showing a differential abundance during  
110 growth on all carbon and energy sources tested. The vast majority of identified proteins were  
111 differentially abundant only under one specific growth condition. During growth on glycerol and  
112 2-phenylethanol, which both represent substrates for PedE and PedH, a disproportionately high  
113 number of metabolism related proteins were more abundant in the presence of  $\text{La}^{3+}$ , while this  
114 was not the case during growth on citrate and glucose, carbon and energy sources that do not  
115 represent substrates for the two PQQ-ADHs. In addition, physiological characteristics, such as  
116 growth rates and the lag-phase, of cultures could be linked to the differential activity pattern of  
117 PedE and PedH during growth on glycerol. Based on these results, we were able to identify  
118 and reconstruct a novel metabolic route for glycerol utilisation, which depends on PedE and/or

119 PedH activity. This route seems to operate in conjunction with the previously described major  
120 degradation pathway initiated by the glycerol kinase GlpK and most likely ensures efficient  
121 growth of *P. putida* on this polyol substrate.

## 122 **Materials and Methods**

### 123 *Bacterial strains, plasmids and culture conditions*

124 A complete list of all strains, plasmids, and primers used in this study can be found in **Table**  
125 **S1** and **Table S2**. All *Pseudomonas putida* and *Escherichia coli* strains were maintained on  
126 solidified LB medium (43). If necessary, 40 µg/mL kanamycin or 20 µg/mL 5-fluorouracil were  
127 added for maintenance and/or selection. For growth, liquid LB medium or a modified M9 salt  
128 medium (12) supplemented with 5 mM 2-phenylethanol, 25 mM succinate, 10 mM glucose, 10  
129 mM citrate, 20 mM DL-glycerate, or 20 mM glycerol as sole source of carbon and energy was  
130 used. If not stated otherwise, precultures were grown overnight in test tubes with 3 ml M9  
131 medium supplemented with succinate at 30°C and 180 rpm. The next day, cells were washed  
132 twice with M9 medium without supplemented C-source, and used to inoculate 200 µL of M9  
133 medium supplemented with the desired C-source in a 96-well microtiter plate (Falcon, product  
134 no. 353047 or Sarstedt, product no. 83.3924) and incubated at 30°C and 250 rpm in a  
135 microplate reader (Xenius, Safas Monaco) or 28°C and 220 rpm in a rotary shaker (Forma,  
136 Thermo Scientific). Maximum growth rates ( $\mu_{\max}$ ) and lag-times ( $\lambda$ ) were estimated based on  
137 fitting the natural logarithm of the relative OD<sub>600</sub> values ( $\ln(N/N_0)$ , with N being OD<sub>600</sub> at time t)  
138 with the Richards growth model using the “grofit” package in R (44). As OD<sub>600</sub> decreased  
139 directly upon begin of the experiment,  $\ln(N/N_{t=3h})$  was used instead of  $\ln(N/N_0)$  for better fit.  
140 Differences in lag-times, growth rates, and maximal OD<sub>600</sub> during stationary phase (OD<sub>600</sub><sup>max</sup>)  
141 were evaluated by statistical analysis in GraphPad PRISM using a two-tailed t-test ( $\alpha = 0.05$ ,  
142  $n = 3$ ).

143

### 144 *Construction of plasmids*

145 Deletion plasmids pJOE-calA, pJOE-garK, pJOE-glp, and pMW08 were constructed as  
146 follows: the 650-bp to 1000-bp regions upstream and downstream of the *calA* (PP\_2426), *garK*  
147 (PP\_3178), *glpFKRD* (PP\_1076 to PP\_1973), or *glcDEF* (PP\_3745 to PP\_3747) genes were  
148 amplified from genomic DNA of *P. putida* KT2440 using primers PcalA1 to PcalA4, PgarK1 to  
149 PgarK4, Pglp1 to Pglp4, or MWH03 to MWH06 (**Table S2**). The two up- and downstream



150 fragments and BamHI-digested pJOE6261.2 were then joined together using one-step  
151 isothermal assembly (45).

152

### 153 *Strain constructions*

154 Deletion mutant strains were constructed as previously described (46). Briefly, the integration  
155 vector pJOE6261.2 harbouring the up- and downstream regions of the target gene(s) was  
156 transformed into *P. putida* KT2440  $\Delta upp$  (KT2440\*). Kanamycin (Kan) resistant and 5-  
157 fluorouracil (5-FU) sensitive clones were selected and one of these was incubated in LB  
158 medium at 30°C for 24 h. The cell suspension was then plated on M9 minimal agar plates  
159 containing 25 mM succinate and 20  $\mu\text{g ml}^{-1}$  5-FU. Clones that carried the desired gene deletion  
160 were identified by colony PCR of the 5-FU<sup>r</sup> Kan<sup>s</sup> clones using primer pair PcalA1/PcalA4,  
161 PgarK1/PgarK4, Pglp1/Pglp4, or MWH03/MWH06.

162

### 163 *Protein extraction for comparative proteome analysis*

164 For comparative proteome analysis experiments, 50 ml M9 medium supplemented with citrate,  
165 glucose, glycerol or 2-phenylethanol and 0 or 10  $\mu\text{M}$  LaCl<sub>3</sub> were inoculated with an OD<sub>600</sub> of  
166 0.05 from succinate precultures of strain *P. putida* KT2440\* in 250 ml polycarbonate  
167 Erlenmeyer flasks and incubated at 30°C and 180 rpm. When cell cultures reached an OD<sub>600</sub>  
168 of > 0.4, cells were harvested by centrifugation for 15 min at 6000 x g and 4°C. Cell pellets  
169 were resuspended in 1 ml sample buffer (150 mM Tris-HCl pH 6.8; 2 % SDS; 20 mM  
170 dithiothreitol) and heated for 5 min at 95°C with gentle shaking. Subsequently, samples were  
171 centrifuged for 15 min at 21000 x g and 4°C, and the supernatants were stored in new reaction  
172 tubes at -20 °C. In a next step, proteins were precipitated using chloroform-methanol (47) and  
173 pellets were resuspended in Tris-buffered (50 mM, pH 8.5) urea (6 M). Protein concentrations  
174 were determined by the Bradford assay (48).

175

### 176 *In-solution digest of proteins and peptide purification with C18 Stage Tips*

177 To 25 µg protein in 60 µl Tris-buffered (50 mM, pH 8.5) urea (6 M), DTT was added to a final  
178 concentration of 10 mM to guarantee reduction of cysteines. Samples were incubated for 30  
179 min at 56 °C under shaking at 1000 rpm. Alkylation of cysteines was performed by adding 30  
180 mM iodoacetamide and incubation for 45 min at room temperature in the dark. Alkylation was  
181 stopped by adding 50 mM DTT and samples were incubated for another 10 min at RT. 500 ng  
182 LysC protease (Roche) in 50 mM Tris buffer (pH 8.5) was added and samples were digested  
183 overnight at 30 °C. Next, the urea in the reaction mixture was diluted to 2 M by adding the  
184 appropriate amount of Tris buffer (50 mM, pH 8.5). 1 µg trypsin (Roche) in Tris buffer (50 mM,  
185 pH 8.5) was added and digestion was continued for 4 hours at 37 °C. The digest was stopped  
186 by addition of 3 µl 10% (v/v) trifluoroacetic acid (TFA). Next, peptide mixtures were  
187 concentrated and desalted on C18 stage tips (49) and dried under vacuum. Samples were  
188 dissolved in 20 µl 0.1% (v/v) TFA. Aliquots of 1 µl were subjected to nanoLC-MS/MS analysis.

189

#### 190 *Mass spectrometry analysis*

191 NanoLC-ESI-MS/MS experiments were performed on an EASY-nLC 1200 system (Thermo  
192 Fisher Scientific) coupled to a Q-Exactive Plus mass spectrometer (Thermo Fisher Scientific)  
193 using an EASY-Spray nanoelectrospray ion source (Thermo Fisher Scientific). Tryptic peptides  
194 were directly injected to an EASY-Spray analytical column (2 µm, 100 Å PepMapRSLC C18,  
195 25 cm × 75 µm, Thermo Fisher Scientific) operated at constant temperature of 35 °C. Peptides  
196 were separated at a flow rate of 250 nL/min using a 240 min gradient with the following profile:  
197 2% - 10% solvent B in 100 min, 10% - 22% solvent B in 80 min, 22% - 45% solvent B in 55  
198 min, 45% - 95% solvent B in 5 min and isocratic at 90% solvent B for 15 min. Solvents used  
199 were 0.5 % acetic acid (solvent A) and 0.5% acetic acid in acetonitrile/H<sub>2</sub>O (80/20, v/v, solvent  
200 B). The Q Exactive Plus was operated under the control of XCalibur 3.0.63 software. MS  
201 spectra (m/z = 300-1600) were detected in the Orbitrap at a resolution of 70000 (m/z = 200)  
202 using a maximum injection time (MIT) of 100 ms and an automatic gain control (AGC) value of  
203 1 × 10<sup>6</sup>. Internal calibration of the Orbitrap analyzer was performed using lock-mass ions from  
204 ambient air as described elsewhere (50). Data dependent MS/MS spectra were generated for

205 the 10 most abundant peptide precursors in the Orbitrap using high energy collision  
206 dissociation (HCD) fragmentation at a resolution of 17500, a normalized collision energy of 27  
207 and an intensity threshold of  $1.3 \times 10^5$ . Only ions with charge states from +2 to +5 were selected  
208 for fragmentation using an isolation width of 1.6 Da. For each MS/MS scan, the AGC was set  
209 at  $5 \times 10^5$  and the MIT was 100 ms. Fragmented precursor ions were dynamically excluded for  
210 30 s within a 5 ppm mass window to avoid repeated fragmentation.

211

### 212 *Protein quantification and data analysis*

213 Raw files were imported into MaxQuant (51) version 1.6.0.1 for protein identification and label-  
214 free quantification (LFQ) of proteins. Protein identification in MaxQuant was performed using  
215 the database search engine Andromeda (52). MS spectra and MS/MS spectra were searched  
216 against *P. putida* KT2440 protein sequence database downloaded from UniProt (53).  
217 Reversed sequences as decoy database and common contaminant sequences were added  
218 automatically by MaxQuant. Mass tolerances of 4.5 ppm (parts per million) for MS spectra and  
219 20 ppm for MS/MS spectra were used. Trypsin was specified as enzyme and two missed  
220 cleavages were allowed. Carbamidomethylation of cysteines was set as a fixed modification  
221 and protein N-terminal acetylation and oxidation were allowed as variable modifications. The  
222 'match between runs' feature of MaxQuant was enabled with a match time window of one  
223 minute and an alignment time window of 20 minutes. Peptide false discovery rate (FDR) and  
224 protein FDR thresholds were set to 0.01.

225 Statistical analysis including *t*-tests and principal component analysis (PCA) were performed  
226 using Perseus software version 1.6.0.2 (54). Matches to contaminant (e.g., keratins, trypsin)  
227 and reverse databases identified by MaxQuant were excluded from further analysis. Proteins  
228 were considered for LFQ (label free quantification) if they were identified by at least two  
229 peptides. First, normalized LFQ values from MaxQuant were log<sub>2</sub> transformed. Missing values  
230 were replaced from normal distribution using a width of 0.2 and a downshift of 2.0. Statistical  
231 differences between two sample groups were determined using an unpaired *t*-test and a *p*-  
232 value < 0.01 and a regulation factor > 2 (log<sub>2</sub> fold-change > 1) were considered as significant

233 change in protein abundance. The mass spectrometry proteomics data will be deposited to the  
234 ProteomeXchange Consortium via the PRIDE (55) partner repository (submitted).

235

### 236 *Purification and activity measurement of PQQ-ADHs PedE and PedH*

237 To measure the activity of the two PQQ-ADHs PedE and PedH, the enzymes were expressed  
238 in *E. coli* BL21(DE3) cells using plasmids pMW09 and pMW10, and purified by affinity  
239 chromatography as described elsewhere (12). The activities with the four substrates 2-  
240 phenylethanol, citrate, glucose and glycerol were determined at a concentration of 10 mM  
241 using a previously described colorimetric assay (12) with one minor modification. To represent  
242 the growth conditions, 1  $\mu\text{M}$   $\text{La}^{3+}$  instead of 1  $\mu\text{M}$   $\text{Pr}^{3+}$  was used as metal cofactor for PedH.

243

### 244 **Funding Information**

245 The work of Matthias Wehrmann and Janosch Klebensberger was supported by an individual  
246 research grant from the Deutsche Forschungsgemeinschaft (DFG, KL 2340/2-1). The work of  
247 Maxime Toussaint and Patrick Billard was supported in part by Labex Ressources21 (ANR-  
248 10-LABX-21-01).

249

### 250 **Acknowledgements**

251 The authors would like to thank Prof. Bernhard Hauer for his continuous support. The authors  
252 further declare that the research was conducted in the absence of any commercial or financial  
253 relationships that could be construed as a potential conflict of interest.

254

## 255 Results

256 We have recently demonstrated that the two PQQ-ADHs PedE and PedH are inversely  
257 regulated dependent on the presence of rare earth elements (REEs) and that a complex  
258 signalling network, which includes the activity of the PedR2/PedS2 two-component system,  
259 orchestrates this regulation (12, 38). To identify whether a global cellular response of *P. putida*  
260 KT2440 towards REEs beyond the regulation of the PQQ-ADHs exists, we used a comparative  
261 proteomic analysis during growth on four different carbon and energy sources, namely 2-  
262 phenylethanol, glycerol, glucose, and citrate.

263

### 264 *Evaluation of proteomics data*

265 Proteins were extracted from cells of *P. putida* by SDS to enable extraction of cytoplasmic as  
266 well as transmembrane proteins followed by label free nano-LC-MS/MS quantification. In total,  
267 2771 proteins with at least two unique peptides and an FDR  $\leq 1\%$  were identified and quantified  
268 by our proteomics approach, corresponding to approximately 50% of the *P. putida* KT2440  
269 proteome. Principal component analysis revealed high reproducibility for sample replicates and  
270 distinct patterns for the different carbon sources (**Fig. S1**). The majority of proteins was  
271 increased or decreased in abundance in response to the different carbon and energy sources.  
272 In contrast, minor differences were observed in the presence or absence of  $\text{La}^{3+}$  during growth  
273 on the same carbon and energy source. Proteins that exhibited a 2-fold or higher change in  
274 abundance between different growth conditions and a  $p$ -value  $\leq 0.01$  were considered as  
275 differentially abundant.

276

### 277 *Effect of lanthanum on protein abundance during growth with different substrates*

278 According to the aforementioned criteria, 56 proteins were identified as differentially abundant  
279 comparing growing cells of *P. putida* in the presence and absence of  $\text{La}^{3+}$  with different carbon  
280 sources (**Fig. 1, Table 3, Table S3-S5**). In these studies, only the  $\text{Ca}^{2+}$ -dependent PQQ-ADH  
281 PedE (PP\_2674) showed a decreased abundance in response to  $\text{La}^{3+}$  during growth on all four  
282 different carbon and energy sources. The  $\text{Ln}^{3+}$ -dependent PQQ-ADH PedH (PP\_2679)

283 showed an increased abundance in response to  $\text{La}^{3+}$  during growth on glucose, glycerol, and  
284 2-phenylethanol, whereas an uncharacterized pentapeptide repeat containing protein  
285 (PP\_2673) that is directly upstream of *pedE* showed a decreased abundance during growth  
286 on glycerol and 2-phenylethanol (**Fig. 1**). The remaining 53 proteins were only identified under  
287 one specific growth condition (**Table 3, Table S3-S5**).

288 During growth on 2-phenylethanol and glycerol, a majority of the identified proteins was  
289 increased in abundance (80% and 70%) in response to  $\text{La}^{3+}$  (**Table 3, Table S3**). For glucose  
290 and citrate this was different, as most of the identified proteins were found to be less abundant  
291 in response to  $\text{La}^{3+}$  (36% and 40% during growth on glucose and citrate; **Table S4 and Table**  
292 **S5**). Notably, the majority of the identified proteins were related to metabolism according to the  
293 cluster of orthologous protein groups (COG) database (56). To test whether the observed  
294 conditional proteomic response is linked to PedE and/or PedH activity, we determined the  
295 corresponding enzyme activities with all four carbon and energy sources (**Table 1**). Apart from  
296 the already known substrate 2-phenylethanol, PedE and PedH also showed activity with  
297 glycerol, whereas no activity could be detected with citrate or glucose.

298

### 299 *Effect of lanthanum during growth on glycerol*

300 From our proteomic- and biochemical data, we speculated that PedE and PedH activity could  
301 play a beneficial role during glycerol metabolism of *P. putida* KT2440. As the degradation  
302 pathway and growth characteristics of this organism have been recently characterized in great  
303 detail (57, 58), we wanted to have a closer look on the effect of  $\text{La}^{3+}$  during growth on this  
304 specific carbon and energy source. In these experiments (**Fig. 2A, Table 2**), we consistently  
305 observed a shorter lag-phase ( $\lambda$ ) of the cultures in response to  $\text{La}^{3+}$ -availability ( $10.2 \pm 0.2$  h  
306 vs.  $17.3 \pm 0.2$ ). Additionally, the corresponding values of the specific growth rates ( $\mu_{\text{max}}$ ,  $0.201$   
307  $\pm 0.004$  vs.  $0.341 \pm 0.010$   $\text{h}^{-1}$ ) and the maximal  $\text{OD}_{600}$  in stationary phase ( $\text{OD}_{600}^{\text{max}}$ ;  $0.680 \pm$   
308  $0.014$  vs.  $0.884 \pm 0.004$ ) of the cultures differed in the presence or absence of  $\text{La}^{3+}$ ,  
309 respectively. As the purified PedH enzyme showed a 3-fold higher specific activity towards  
310 glycerol compared to PedE *in vitro* ( $0.9 \pm 0.1$  U  $\text{mg}^{-1}$  vs.  $0.3 \pm 0.1$  U  $\text{mg}^{-1}$ ; **Table 1**), we

311 speculated that this increased glycerol conversion by PedH could be the underlying cause for  
312 the observed differences in growth parameters. When subsequently a  $\Delta pedE \Delta pedH$  strain  
313 was analysed for growth in the presence and absence of  $La^{3+}$  (**Fig. 2B, Table 2**), no significant  
314 differences in  $\lambda$  and  $\mu_{max}$  were observed for the  $\Delta pedE \Delta pedH$  strain in response to  $La^{3+}$  while,  
315 although less profound, small differences in  $OD_{600}^{max}$  were still detected. Further, under both  
316 conditions the double deletion strain showed a lag-phase that was undistinguishable from that  
317 of the parental strain in the absence of  $La^{3+}$  but dramatically longer than that of the parental  
318 strain in the presence of  $La^{3+}$  ( $17.5 \pm 0.3$  h in the absence of  $La^{3+}$  and  $17.2 \pm 0.4$  h in the  
319 presence of  $10 \mu M La^{3+}$ ). Interestingly, the growth rates under both conditions ( $0.276 \pm 0.008$   
320  $h^{-1}$  and  $0.291 \pm 0.012 h^{-1}$ ) were significantly higher ( $p < 0.01$ ) than those of the parental strain  
321 in presence of  $La^{3+}$  while still being significantly below ( $p < 0.05$ ) those of the parental strain in  
322 the absence of  $La^{3+}$ .

323 These results implied that the two PQQ-ADHs can indeed be beneficial for growth on glycerol  
324 and that a functionally active PedH enzyme is the underlying cause for the  $La^{3+}$ -dependent  
325 differences in lag-times and growth rates and to some extent also for differences in  $OD_{600}^{max}$   
326 of KT2440 cultures. As PedE and PedH as well as the remaining proteins that were found to  
327 be differentially abundant in response to  $La^{3+}$  during growth on glycerol, are not part of the  
328 described degradation pathway in *P. putida* KT2440 (57, 58), we hypothesized that an  
329 additional metabolic route exists (**Fig. 3**). Based on our proteomic data, this route could be  
330 initiated by the activity of PedH and the oxidation of glycerol to glycolaldehyde. In the next  
331 steps glycolaldehyde could be oxidized to glycerate by PedH, the aldehyde dehydrogenase  
332 AldB-II, or the aldehyde oxidase complex composed of proteins PP\_3621 (IorA-II), PP\_3622  
333 and PP\_3623 (AdhB). After phosphorylation by the glycerate kinase GarK, glycerate-2-  
334 phosphate could eventually enter the central metabolism.

335 If such a metabolic route exists, a  $\Delta glpFKRD$  deletion strain should still be able to grow with  
336 glycerol as sole source of carbon and energy, whereas a  $\Delta pedE \Delta pedH \Delta glpFKRD$  deletion  
337 mutant should not. To test this scenario, the corresponding strains were constructed and  
338 characterized for their growth phenotypes (**Fig. 4A**). We found that *P. putida* KT2440 indeed



339 grew on glycerol independent of the GlpFKRD pathway, although growth was dramatically  
340 impaired compared to the parental strain or strain  $\Delta pedE \Delta pedH$ . When PedE and PedH were  
341 additionally deleted, no growth was observed even after a prolonged incubation time of 5 d.  
342 This supported our hypothesis that a metabolic route for glycerol next to the GlpFKRD pathway  
343 exists and that this route is initiated by PedE and PedH, most likely by the oxidation of glycerol  
344 to glyceraldehyde (**Fig. 3**). Given that the route further proceeds *via* glycerate and glycerate-  
345 2-phosphate, different cellular concentrations of these metabolites would be expected during  
346 growth on glycerol in a mutant that is not able to use the GlpFKRD pathway. Interestingly, a  
347 companion study to this work employed a metabolome analysis using glycerol-growing cells  
348 of *P. putida* KT2440 and a  $\Delta glpK$  deletion strain, which can only use the proposed novel route  
349 *via* PedE and PedH (59). In their experiments, the authors observed that the glycerate  
350 concentration measured for the  $\Delta glpK$  strain was dramatically increased compared to the wild  
351 type, whereas concentrations of glyceraldehyde and glyceraldehyde-3-phosphate were in the  
352 same range for both strains. These data suggested that glycerate is indeed an intermediate  
353 during *glpFKRD*-independent growth, and that the activity of downstream proteins represent  
354 the bottleneck of the metabolic route leading to the observed accumulation. As our proteomic  
355 data indicated the involvement of the predicted glycerate kinase GarK, we constructed a  $\Delta garK$   
356 deletion strain and speculated that this strain should lack the ability to phosphorylate glycerate  
357 and would hence be incapable of channelling glycerate-2-phosphate into the central  
358 metabolism. We indeed observed no growth of a  $\Delta garK$  mutant on glycerate even after  
359 incubation of up to 5 d, while strain  $\Delta pedE \Delta pedH \Delta glpFKRD$  could grow and reached  $OD_{600}^{max}$   
360 within 72 h of incubation under the condition tested (**Fig. 4B**).

361 When grown on glycerol, no significant effect on growth rates and lag-times as well as only a  
362 minor, but significant, negative effect on the  $OD_{600}^{max}$  ( $p < 0.01$ ) was observed for the  $\Delta garK$   
363 deletion in the absence of  $La^{3+}$ . In contrast, the same deletion caused a dramatic growth  
364 impairment in the presence of  $La^{3+}$  (**Fig. 5A, Table 2**) and consequently the stationary phase  
365 was not reached during the 40 h of incubation. Hence, no reliable growth parameter could be



366 deduced from these data. It is however obvious that the growth rate was far below the one of  
367 the parental strain in the presence of  $\text{La}^{3+}$ .

368 Notably, some of the most severely upregulated proteins in response to  $\text{La}^{3+}$  are either related  
369 to stress, namely the multidrug efflux pump MexEF and the alkylhydroperoxide reductase  
370 subunits AhpC and AhpF, or are enzymes that play no obvious roles within the proposed  
371 metabolic route such as CalA, a predicted coniferyl alcohol dehydrogenase, and the glycolate  
372 oxidase GlcDEF. To investigate the potential influence of the latter two enzymes, we  
373 constructed and analysed the corresponding  $\Delta calA$  and  $\Delta glcDEF$  mutants and tested their  
374 growth pattern with glycerol (**Fig. 5B; Table 2**). The  $\Delta glcDEF$  mutant showed a growth  
375 behaviour similar to the parental strain. In contrast, the  $\Delta calA$  strain exhibited a significantly  
376 increased growth rate ( $p < 0.01$ ) and higher  $\text{OD}_{600}^{\text{max}}$  ( $p < 0.01$ ) than the parental strain in the  
377 presence of  $\text{La}^{3+}$  while showing no significant differences in  $\text{OD}_{600}^{\text{max}}$  and maximal growth rate  
378 and only minor differences ( $p < 0.05$ ) in lag-times in the absence of  $\text{La}^{3+}$  (**Fig. 5C; Table 2**).

## 379 Discussion

380 In the present study, the cellular responses of *P. putida* KT2440 towards La<sup>3+</sup>-availability during  
381 growth on several carbon and energy sources were investigated. The only protein that showed  
382 a differential abundance independent of the substrate used for growth was the Ca<sup>2+</sup>-dependent  
383 PQQ-ADH PedE. This result is in line with data from a previous study (38), which demonstrated  
384 that the La<sup>3+</sup>-induced downregulation of *pedE* is dependent on the PedS2/PedR2 two-  
385 component system that, based on our current observation, seems to be functional under all  
386 tested conditions. The other two proteins that showed differential abundance under more than  
387 one culture condition (PedH, PP\_2673) are both also part of the *ped* gene cluster. Notably, the  
388 carbon and energy sources under which these proteins were identified either represent  
389 substrates of PedE and PedH, or can be converted by an enzyme that depends on the same  
390 PQQ-cofactor, namely the glucose dehydrogenase Gcd. The remaining 53 proteins that  
391 showed differential abundance in response to La<sup>3+</sup> were identified only during growth on one  
392 specific carbon and energy source, suggesting a conditional regulation. For glycerol, we  
393 provide striking evidence that the increased activity of PedH compared to PedE is the primary  
394 cause for the observed proteomic and physiological changes during growth.

395 Thus far, the degradation of glycerol was described to start by the uptake *via* GlpF,  
396 phosphorylation by GlpK, and subsequent GlpD-catalysed oxidation of glycerol-3-phosphate  
397 to dihydroxyacetone-3-phosphate (58). In a next step, dihydroxyacetone-3-phosphate is  
398 interconverted to glyceraldehyde-3-phosphate and enters the central metabolism. This  
399 pathway is negatively regulated by the transcriptional regulator GlpR, and the de-repression  
400 of the *glpFKRD* operon is believed to depend on the intracellular concentration of glycerol-3-  
401 phosphate, which finally impacts the lag-phase of cultures (57). As such, it was interesting to  
402 find that growth on glycerol in the presence of La<sup>3+</sup> led to a shorter lag phase and lower growth  
403 rate of the parent strain, and that a  $\Delta pedE \Delta pedH$  mutant showed a lag-phase similar to the  
404 parent in absence of La<sup>3+</sup> without any beneficial effect of La<sup>3+</sup> while still growing with a higher  
405 growth rate than the parent strain in presence of La<sup>3+</sup>. Further experiments revealed that a  
406  $\Delta glpFKRD$  deletion strain is still able to grow on glycerol, while a  $\Delta pedE \Delta pedH \Delta glpFKRD$  is

407 not. Together with the notion that a  $\Delta garK$  mutant cannot utilize glycerate, this strongly  
408 indicates the existence of a novel route for glycerol metabolism, in which PedE and PedH  
409 catalyse the initial oxidation of glycerol to glyceraldehyde. In the presence of  $La^{3+}$ , the route  
410 seems to proceed *via* a second oxidation step to glycerate, which is subsequently converted  
411 to glycerate-2-phosphate by the activity of GarK (**Fig. 3**). The PedE/PedH-dependent route,  
412 despite being important for efficient growth, clearly is not the main route for glycerol  
413 metabolism, as the effect of the  $\Delta pedE \Delta pedH$  deletion on the lag-phase with glycerol is far  
414 less severe than deletion of the *glpFKRD* gene cluster. It also appears that the PedE/PedH-  
415 dependent route is less efficient than the GlpFKRD pathway, as the overall growth of the  
416  $\Delta glpFKRD$  strain is substantially impaired in comparison to the  $\Delta pedE \Delta pedH$  strain.

417 A possible explanation could be the formation of the toxic intermediate glyceraldehyde, which  
418 is known for its protein crosslinking properties and the formation of superoxide radicals due to  
419 auto-oxidation (60, 61). The observed differences in growth rates and  $OD_{600}^{max}$  in response to  
420  $La^{3+}$  in the parent strain could thus reflect the increased metabolic flux towards glyceraldehyde  
421 due to the higher specific activity of PedH compared to PedE. This would also explain the  
422 severe  $La^{3+}$ -dependent growth impairment of the  $\Delta garK$  mutant, as one can assume that even  
423 higher concentrations of glyceraldehyde accumulate in a mutant that cannot process glycerate.  
424 The notion that the MexEF RND-type transporter proteins, which are involved in efflux of  
425 various toxic compounds (62), and the alkylhydroperoxide reductase subunits AhpC and AhpF,  
426 which have been linked to ROS detoxification in *P. putida* (63), were also more abundant in  
427 presence of  $La^{3+}$  during growth on glycerol are supportive of such a hypothesis.

428 To explain the impact of  $La^{3+}$  on the lag-times of cultures, one could speculate that in addition  
429 to glycerol-3-phosphate, also other phosphorylated derivatives, such as glycerate-2-  
430 phosphate, are able to relieve the repression of *glpFKRD* by GlpR. However, as in the absence  
431 of  $La^{3+}$  the growth phenotype of the  $\Delta garK$  mutant is indistinguishable from that of the parental  
432 strain, and since the growth rate of the parent strain in absence of  $La^{3+}$  is still significantly  
433 higher than the growth rate of strain  $\Delta pedE \Delta pedH$ , we postulate that yet another metabolic  
434 route is present that contributes to growth without affecting the lag-phase. This second route

435 could proceed *via* the phosphorylation of glyceraldehyde to glyceraldehyde-3-phosphate by  
436 the activity of a so-far unknown kinase. Whether both alternative routes to the GlpFKRD  
437 pathway are functional in parallel or whether the metabolic flux *via* glycerate is exclusively  
438 induced in the presence of  $\text{La}^{3+}$  is currently unknown and would need to be tested in future  
439 studies. Similarly, the question why proteins that cannot be associated to the newly discovered  
440 routes for glycerol are among the most differentially abundant proteins in response to  $\text{La}^{3+}$   
441 remains to be elucidated. It is however worthwhile noting that CalA and GlcDEF are either  
442 known (GlcDEF) or predicted (CalA) by the PROSITE software tool  
443 (<https://prosite.expasy.org/>) (64) to be catalytically active on 2-hydroxy acids. As such,  
444 potential activities towards pathway intermediates such as glycerate cannot be excluded at the  
445 moment.

446 From our data, the  $\text{La}^{3+}$ -dependent proteomic and physiological changes during growth on  
447 glycerol can be explained by a shift in metabolic flux resulting from the differences in specific  
448 catalytic activities between PedH and PedE. A similar metabolic-driven interpretation can also  
449 be used to explain the proteomic differences during growth on other carbon and energy  
450 sources that are known to be substrates for PedE and PedH such as 2-phenylethanol.  
451 However, this logic fails to explain the differences observed during growth on glucose and  
452 citrate, as they do not represent substrates for PedE and/or PedH. Despite the fact that we  
453 currently do not know the underlying cause for the conditional proteomic changes under these  
454 conditions, it indicates the presence of additional effects of REEs beside the interaction with  
455 PedH and PedS2/PedR2. Such effects could include the inhibition of protein functions by  
456 mismetallation (65, 66), changes in the physiology of the outer membrane (67), or so far  
457 unknown REE-dependent enzymes and regulator proteins. The latter explanation is of  
458 particular interest, as two recent studies provide strong evidence that specific importers that  
459 can transport  $\text{Ln}^{3+}$  into the cytoplasm of methylotrophic bacteria do exist (41, 68).

460 Altogether, the current study demonstrates that the utilization of REEs can influence important  
461 physiological traits of *P. putida*, which could be highly beneficial in competitive environmental  
462 niches such as the rhizosphere. The previously reported fertilizing effect of REEs on different

463 food crops could hence be partially the result of increased competitiveness of plant growth  
464 promoting organisms such as *P. putida* during root colonization. This hypothesis is further  
465 supported by a recent study, which found that Pseudomonads predominantly thrive on root  
466 exudates *in vivo* and are hence enriched in the rhizosphere of *Arabidopsis thaliana* (10). As  
467 such, it will be interesting to see what future research will add to the currently emerging theme  
468 of REEs being an important micronutrient for methylotrophic and non-methylotrophic  
469 organisms.

470 **Reference**

- 471 1. Mendes R, Garbeva P, Raaijmakers J. 2013. The rhizosphere microbiome: significance  
472 of plant beneficial, plant pathogenic, and human pathogenic microorganisms. *FEMS*  
473 *Microbiol Rev* 37:634–663.
- 474 2. Raaijmakers J, Paulitz TC, Steinberg C, Alabouvette C, Moënne-Loccoz Y. 2009. The  
475 rhizosphere: a playground and battlefield for soilborne pathogens and beneficial  
476 microorganisms. *Plant Soil* 321:341–361.
- 477 3. Berg G, Roskot N, Steidle A, Eberl L, Zock A, Smalla K. 2002. Plant-Dependent  
478 Genotypic and Phenotypic Diversity of Antagonistic Rhizobacteria Isolated from  
479 Different *Verticillium* Host Plants. *Appl Environ Microbiol* 68:3328–3338.
- 480 4. Carvalhais LC, Dennis PG, Fedoseyenko D, Hajirezaei MR, Borriss R, Von Wirén N.  
481 2011. Root exudation of sugars, amino acids, and organic acids by maize as affected  
482 by nitrogen, phosphorus, potassium, and iron deficiency. *J Plant Nutr Soil Sci* 174:3–  
483 11.
- 484 5. Dakora FD, Phillips DA. 2002. Root exudates as mediators of mineral acquisition in low-  
485 nutrient environments. *Plant Soil* 245:35–47.
- 486 6. Schmidt R, Cordovez V, de Boer W, Raaijmakers J, Garbeva P. 2015. Volatile affairs in  
487 microbial interactions. *ISME J* 9:2329–2335.
- 488 7. Insam H, Seewald MSA. 2010. Volatile organic compounds (VOCs) in soils. *Biol Fertil*  
489 *Soils* 46:199–213.
- 490 8. Wackett LP. 2003. *Pseudomonas putida*—a versatile biocatalyst. *Nat Biotechnol*  
491 21:136–138.
- 492 9. Nelson KE, Weinel C, Paulsen IT, Dodson RJ, Hilbert H, Martins dos Santos VAP, Fouts  
493 DE, Gill SR, Pop M, Holmes M, Brinkac L, Beanan M, DeBoy RT, Daugherty S, Kolonay  
494 J, Madupu R, Nelson W, White O, Peterson J, Khouri H, Hance I, Lee PC, Holtzapple  
495 E, Scanlan D, Tran K, Moazzez A, Utterback T, Rizzo M, Lee K, Kosack D, Moestl D,  
496 Wedler H, Lauber J, Stjepandic D, Hoheisel J, Straetz M, Heim S, Kiewitz C, Eisen J,  
497 Timmis KN, Dusterhoft A, Tumbler B, Fraser CM. 2002. Complete genome sequence

- 498 and comparative analysis of the metabolically versatile *Pseudomonas putida* KT2440.  
499 Environ Microbiol 4:799–808.
- 500 10. Worsley SF, Macey MC, Newitt JT, Patrick E, Yu DW, Wilkinson B, Murrell C, Hutchings  
501 MI. 2019. Investigating the role of exudates in recruiting *Streptomyces* bacteria to the  
502 *Arabidopsis thaliana* root microbiome. bioRxiv 532309.
- 503 11. Mückschel B, Simon O, Klebensberger J, Graf N, Rosche B, Altenbuchner J, Pfannstiel  
504 J, Huber A, Hauer B. 2012. Ethylene glycol metabolism by *Pseudomonas putida*. Appl  
505 Environ Microbiol 78:8531–9.
- 506 12. Wehrmann M, Billard P, Martin-Meriadec A, Zegeye A, Klebensberger J. 2017.  
507 Functional Role of Lanthanides in Enzymatic Activity and Transcriptional Regulation of  
508 Pyrroloquinoline Quinone-Dependent Alcohol Dehydrogenases in *Pseudomonas putida*  
509 KT2440. MBio 8:e00570-17.
- 510 13. Takeda K, Matsumura H, Ishida T, Samejima M, Igarashi K, Nakamura N, Ohno H.  
511 2013. The two-step electrochemical oxidation of alcohols using a novel recombinant  
512 PQQ alcohol dehydrogenase as a catalyst for a bioanode. Bioelectrochemistry 94:75–  
513 78.
- 514 14. Firsching FH, Brune SN. 1991. Solubility products of the trivalent rare-earth phosphates.  
515 J Chem Eng Data 36:93–95.
- 516 15. Pol A, Barends TRM, Dietl A, Khadem AF, Eygensteyn J, Jetten MSM, Op den Camp  
517 HJM. 2014. Rare earth metals are essential for methanotrophic life in volcanic mudpots.  
518 Environ Microbiol 16:255–264.
- 519 16. Hibi Y, Asai K, Arafuka H, Hamajima M, Iwama T, Kawai K. 2011. Molecular structure  
520 of La<sup>3+</sup>-induced methanol dehydrogenase-like protein in *Methylobacterium*  
521 *radiotolerans*. J Biosci Bioeng 111:547–549.
- 522 17. Fitriyanto NA, Fushimi M, Matsunaga M, Pertiwiningrum A, Iwama T, Kawai K. 2011.  
523 Molecular structure and gene analysis of Ce<sup>3+</sup>-induced methanol dehydrogenase of  
524 *Bradyrhizobium* sp. MAFF211645. J Biosci Bioeng 111:613–617.
- 525 18. Good NM, Vu HN, Suriano CJ, Subuyuj GA, Skovran E, Martinez-Gomez NC. 2016.

- 526 Pyrroloquinoline Quinone Ethanol Dehydrogenase in *Methylobacterium extorquens*  
527 AM1 Extends Lanthanide-Dependent Metabolism to Multicarbon Substrates. J Bacteriol  
528 198:3109–3118.
- 529 19. Vu HN, Subuyuj GA, Vijayakumar S, Good NM, Martinez-Gomez NC, Skovran E. 2016.  
530 Lanthanide-Dependent Regulation of Methanol Oxidation Systems in *Methylobacterium*  
531 *extorquens* AM1 and Their Contribution to Methanol Growth. J Bacteriol 198:1250–  
532 1259.
- 533 20. Masuda S, Suzuki Y, Fujitani Y, Mitsui R, Nakagawa T, Shintani M, Tani A. 2018.  
534 Lanthanide-Dependent Regulation of Methylo-trophy in *Methylobacterium aquaticum*  
535 Strain 22A. mSphere 3:e00462-17.
- 536 21. Chistoserdova L. 2016. Lanthanides: New life metals? World J Microbiol Biotechnol  
537 32:138.
- 538 22. Keltjens JT, Pol A, Reimann J, Op den Camp HJM. 2014. PQQ-dependent methanol  
539 dehydrogenases: rare-earth elements make a difference. Appl Microbiol Biotechnol  
540 98:6163–83.
- 541 23. Sowell SM, Abraham PE, Shah M, Verberkmoes NC, Smith DP, Barofsky DF,  
542 Giovannoni SJ. 2011. Environmental proteomics of microbial plankton in a highly  
543 productive coastal upwelling system. ISME J 5:856–865.
- 544 24. Taubert M, Grob C, Howat AM, Burns OJ, Dixon JL, Chen Y, Murrell JC. 2015. XoxF  
545 encoding an alternative methanol dehydrogenase is widespread in coastal marine  
546 environments. Environ Microbiol 17:3937–3948.
- 547 25. Lv H, Sahin N, Tani A. 2018. Isolation and genomic characterization of  
548 *Novimethylophilus kurashikiensis* gen. nov. sp. nov., a new lanthanide-dependent  
549 methylo-trophic species of Methylophilaceae. Environ Microbiol 20:1204–1223.
- 550 26. Cotruvo JA, Featherston ER, Mattocks JA, Ho J V, Laremore TN. 2018. Lanmodulin: A  
551 Highly Selective Lanthanide-Binding Protein from a Lanthanide-Utilizing Bacterium. J  
552 Am Chem Soc jacs.8b09842.
- 553 27. Gu W, Semrau JD. 2017. Copper and cerium-regulated gene expression in



- 554 *Methylosinus trichosporium* OB3b. Appl Microbiol Biotechnol 101:8499–8516.
- 555 28. Good NM, Walser ON, Moore RS, Suriano CJ, Huff AF, Martinez-Gomez NC. 2018.
- 556 Investigation of lanthanide-dependent methylotrophy uncovers complementary roles for
- 557 alcohol dehydrogenase enzymes. bioRxiv 329011.
- 558 29. Fitriyanto NA, Nakamura M, Muto S, Kato K, Yabe T, Iwama T, Kawai K, Pertiwiningrum
- 559 A. 2011. Ce<sup>3+</sup>-induced exopolysaccharide production by *Bradyrhizobium* sp.
- 560 MAFF211645. J Biosci Bioeng 111:146–152.
- 561 30. Zheng Y, Huang J, Zhao F, Chistoserdova L. 2018. Physiological Effect of XoxG(4) on
- 562 Lanthanide-Dependent Methanotrophy. MBio 9:e02430-17.
- 563 31. Krause SMB, Johnson T, Samadhi Karunaratne Y, Fu Y, Beck DAC, Chistoserdova L,
- 564 Lidstrom ME. 2017. Lanthanide-dependent cross-feeding of methane-derived carbon is
- 565 linked by microbial community interactions. Proc Natl Acad Sci 114:358–363.
- 566 32. Akberdin IR, Collins DA, Hamilton R, Oshchepkov DY, Shukla AK, Nicora CD, Nakayasu
- 567 ES, Adkins JN, Kalyuzhnaya MG. 2018. Rare Earth Elements Alter Redox Balance in
- 568 *Methylobacterium alcaliphilum* 20ZR. Front Microbiol 9:1–12.
- 569 33. Diatloff E, Smith FW, Asher CJ. 1995. Rare earth elements and plant growth: III.
- 570 Responses of corn and mungbean to low concentrations of cerium in dilute,
- 571 continuously flowing nutrient solutions. J Plant Nutr 18:1991–2003.
- 572 34. Diatloff E, Asher CJ, Smith FW. 1996. Rare earth elements and plant growth. Proc 8th
- 573 Aust Agron Conf Toowoomba, Queensland, Aust 30 January-2 February, 1996 3–6.
- 574 35. Pang X, Li D, Peng A. 2002. Application of rare-earth elements in the agriculture of
- 575 China and its environmental behavior in soil. Environ Sci Pollut Res 9:143–148.
- 576 36. Wahid PA, Valiathan MS, Kamalam N V., Eapen JT, Vijayalakshmi S, Prabhu RK,
- 577 Mahalingam TR. 2000. Effect of rare earth elements on growth and nutrition of coconut
- 578 palm and root competition for these elements between the palm and *calotropis gigantea*.
- 579 J Plant Nutr 23:329–338.
- 580 37. Xie ZB, Zhu JG, Chu HY, Zhang YL, Zeng Q, Ma HL, Cao ZH. 2002. Effect of lanthanum
- 581 on rice production, nutrient uptake, and distribution. J Plant Nutr 25:2315–2331.

- 582 38. Wehrmann M, Berthelot C, Billard P, Klebensberger J. 2018. The PedS2/PedR2 Two-  
583 Component System Is Crucial for the Rare Earth Element Switch in *Pseudomonas*  
584 *putida* KT2440. *mSphere* 3:1–12.
- 585 39. Farhan UI Haque M, Kalidass B, Bandow N, Turpin EA, DiSpirito AA, Semrau JD. 2015.  
586 Cerium Regulates Expression of Alternative Methanol Dehydrogenases in *Methylosinus*  
587 *trichosporium* OB3b. *Appl Environ Microbiol* 81:7546–7552.
- 588 40. Chu F, Beck DAC, Lidstrom ME. 2016. MxaY regulates the lanthanide-mediated  
589 methanol dehydrogenase switch in *Methylomicrobium buryatense*. *PeerJ* 4:e2435.
- 590 41. Ochsner AM, Hemmerle L, Vonderach T, Nüssli R, Bortfeld-Miller M, Hattendorf B,  
591 Vorholt JA. 2019. Use of rare-earth elements in the phyllosphere colonizer  
592 *Methylobacterium extorquens* PA1. *Mol Microbiol* doi:10.1111/mmi.14208.
- 593 42. Chu F, Lidstrom ME. 2016. XoxF Acts as the Predominant Methanol Dehydrogenase in  
594 the Type I Methanotroph *Methylomicrobium buryatense*. *J Bacteriol* 198:1317–1325.
- 595 43. Maniatis T, Fritsch E, Sambrook J, Laboratory CSH. 1982. *Molecular Cloning: A*  
596 *Laboratory Manual*. Cold Spring Harbor, N.Y. Cold Spring Harbor Laboratory.
- 597 44. Kahm M, Kschischo M, Ludwig J, Lichtenberg-Fraté H, Hasenbrink G. 2015. grofit :  
598 Fitting Biological Growth Curves with R . *J Stat Softw* 33.
- 599 45. Gibson DG. 2011. Enzymatic Assembly of Overlapping DNA Fragments, p. 349–361. *In*  
600 *Methods in Enzymology*.
- 601 46. Graf N, Altenbuchner J. 2011. Development of a method for markerless gene deletion  
602 in *Pseudomonas putida*. *Appl Environ Microbiol* 77:5549–5552.
- 603 47. Wessel D, Flügge UI. 1984. A method for the quantitative recovery of protein in dilute  
604 solution in the presence of detergents and lipids. *Anal Biochem* 138:141–143.
- 605 48. Bradford MM. 1976. A rapid and sensitive method for the quantitation of microgram  
606 quantities of protein utilizing the principle of protein-dye binding. *Anal Biochem* 72:248–  
607 254.
- 608 49. Rappsilber J, Ishihama Y, Mann M. 2003. Stop and Go Extraction Tips for Matrix-  
609 Assisted Laser Desorption/Ionization, Nanoelectrospray, and LC/MS Sample

- 610 Pretreatment in Proteomics. *Anal Chem* 75:663–670.
- 611 50. de Godoy LMF, Mortensen P, Makarov A, Li G, Macek B, Horning S, Pesch R, Mann M,  
612 Olsen J V., Lange O. 2005. Parts per Million Mass Accuracy on an Orbitrap Mass  
613 Spectrometer via Lock Mass Injection into a C-trap. *Mol Cell Proteomics* 4:2010–2021.
- 614 51. Cox J, Mann M. 2008. MaxQuant enables high peptide identification rates, individualized  
615 p.p.b.-range mass accuracies and proteome-wide protein quantification. *Nat Biotechnol*  
616 26:1367–1372.
- 617 52. Cox J, Neuhauser N, Michalski A, Scheltema RA, Olsen J V., Mann M. 2011.  
618 Andromeda: A Peptide Search Engine Integrated into the MaxQuant Environment. *J*  
619 *Proteome Res* 10:1794–1805.
- 620 53. Bateman A, Martin MJ, O'Donovan C, Magrane M, Alpi E, Antunes R, Bely B, Bingley  
621 M, Bonilla C, Britto R, Bursteinas B, Bye-AJee H, Cowley A, Da Silva A, De Giorgi M,  
622 Dogan T, Fazzini F, Castro LG, Figueira L, Garmiri P, Georghiou G, Gonzalez D, Hatton-  
623 Ellis E, Li W, Liu W, Lopez R, Luo J, Lussi Y, MacDougall A, Nightingale A, Palka B,  
624 Pichler K, Poggioli D, Pundir S, Pureza L, Qi G, Rosanoff S, Saidi R, Sawford T,  
625 Shypitsyna A, Speretta E, Turner E, Tyagi N, Volynkin V, Wardell T, Warner K, Watkins  
626 X, Zaru R, Zellner H, Xenarios I, Bougueleret L, Bridge A, Poux S, Redaschi N, Aimo L,  
627 ArgoudPuy G, Auchincloss A, Axelsen K, Bansal P, Baratin D, Blatter MC, Boeckmann  
628 B, Bolleman J, Boutet E, Breuza L, Casal-Casas C, De Castro E, Coudert E, Cuche B,  
629 Doche M, Dornevil D, Duvaud S, Estreicher A, Famiglietti L, Feuermann M, Gasteiger  
630 E, Gehant S, Gerritsen V, Gos A, Gruaz-Gumowski N, Hinz U, Hulo C, Jungo F, Keller  
631 G, Lara V, Lemercier P, Lieberherr D, Lombardot T, Martin X, Masson P, Morgat A, Neto  
632 T, Noupikel N, Paesano S, Pedruzzi I, Pilbout S, Pozzato M, Pruess M, Rivoire C,  
633 Roechert B, Schneider M, Sigrist C, Sonesson K, Staehli S, Stutz A, Sundaram S,  
634 Tognolli M, Verbregue L, Veuthey AL, Wu CH, Arighi CN, Arminski L, Chen C, Chen Y,  
635 Garavelli JS, Huang H, Laiho K, McGarvey P, Natale DA, Ross K, Vinayaka CR, Wang  
636 Q, Wang Y, Yeh LS, Zhang J. 2017. UniProt: the universal protein knowledgebase.  
637 *Nucleic Acids Res* 45:D158–D169.

- 638 54. Tyanova S, Temu T, Sinitcyn P, Carlson A, Hein MY, Geiger T, Mann M, Cox J. 2016.  
639 The Perseus computational platform for comprehensive analysis of (prote)omics data.  
640 Nat Methods 13:731–740.
- 641 55. Vizcaíno JA, Csordas A, Del-Toro N, Dianas JA, Griss J, Lavidas I, Mayer G, Perez-  
642 Riverol Y, Reisinger F, Ternent T, Xu Q-W, Wang R, Hermjakob H. 2016. 2016 update  
643 of the PRIDE database and its related tools. Nucleic Acids Res 44:D447–D456.
- 644 56. Galperin MY, Makarova KS, Wolf YI, Koonin E V. 2015. Expanded microbial genome  
645 coverage and improved protein family annotation in the COG database. Nucleic Acids  
646 Res 43:D261–D269.
- 647 57. Nikel PI, Romero-Campero FJ, Zeidman J a, Goñi-Moreno Á, de Lorenzo V. 2015. The  
648 Glycerol-Dependent Metabolic Persistence of *Pseudomonas putida* KT2440 Reflects  
649 the Regulatory Logic of the GlpR Repressor. MBio 6:1–13.
- 650 58. Nikel PI, Kim J, de Lorenzo V. 2014. Metabolic and regulatory rearrangements  
651 underlying glycerol metabolism in *Pseudomonas putida* KT2440. Environ Microbiol  
652 16:239–254.
- 653 59. Walsh M, Casey M, Kenny S, Narancic T, Blank L, Wierckx N, Ballerstedt H, O'Connor  
654 KE. 2019. Insights into an alternative pathway for glycerol metabolism in a glycerol  
655 kinase deficient *Pseudomonas putida* KT2440. bioRxiv 567230.
- 656 60. Tessier FJ, Monnier VM, Sayre LM, Kornfield JA. 2003. Triosidines: novel Maillard  
657 reaction products and cross-links from the reaction of triose sugars with lysine and  
658 arginine residues. Biochem J 369:705–719.
- 659 61. Benov L, Beema AF. 2003. Superoxide-dependence of the short chain sugars-induced  
660 mutagenesis. Free Radic Biol Med 34:429–433.
- 661 62. Li XZ, Zhang L, Poole K. 1998. Role of the multidrug efflux systems of *Pseudomonas*  
662 *aeruginosa* in organic solvent tolerance. J Bacteriol 180:2987–91.
- 663 63. Hishinuma S, Yuki M, Fujimura M, Fukumori F. 2006. OxyR regulated the expression of  
664 two major catalases, KatA and KatB, along with peroxiredoxin, AhpC in *Pseudomonas*  
665 *putida*. Environ Microbiol 8:2115–2124.

- 666 64. Sigrist CJA, de Castro E, Cerutti L, Cuche BA, Hulo N, Bridge A, Bougueleret L,  
667 Xenarios I. 2012. New and continuing developments at PROSITE. *Nucleic Acids Res*  
668 41:D344–D347.
- 669 65. Agarwal N, Kalra VK. 1983. Interaction of lanthanide cations and uranyl ion with the  
670 calcium/proton antiport system in *Mycobacterium phlei*. *Biochim Biophys Acta -*  
671 *Biomembr* 727:285–292.
- 672 66. Brown PH, Rathjen AH, Graham RD, Tribe DE. 1990. Chapter 92 Rare earth elements  
673 in biological systems, p. 423–452. *In Handbook on the Physics and Chemistry of Rare*  
674 *Earths*.
- 675 67. Peng L, Yi L, Zhexue L, Juncheng Z, Jiabin D, Daiwen P, Ping S, Songsheng Q. 2004.  
676 Study on biological effect of La<sup>3+</sup> on *Escherichia coli* by atomic force microscopy. *J Inorg*  
677 *Biochem* 98:68–72.
- 678 68. Mattocks JA, Ho J V., Cotruvo JA. 2019. A Selective, Protein-Based Fluorescent Sensor  
679 with Picomolar Affinity for Rare Earth Elements. *J Am Chem Soc* jacs.8b12155.
- 680  
681

682 **Tables**

683

684 **Table 1:** Specific enzyme activities of purified PedE and PedH with the four tested growth  
685 substrates at 10 mM measured with 2,6-dichlorophenolindophenol (DCPIP) dependent  
686 colorimetric assay. Data represent the average of biological triplicates with according standard  
687 deviation. Activities below detection limit are indicated (n. d.).

688

| Substrate       | Mean Specific Activity (U mg <sup>-1</sup> ) ± SD |                            |
|-----------------|---------------------------------------------------|----------------------------|
|                 | PedE 1 mM Ca <sup>2+</sup>                        | PedH 1 μM La <sup>3+</sup> |
| Citrate         | n.d.                                              | n.d.                       |
| Glucose         | n.d.                                              | n.d.                       |
| Glycerol        | 0.3 ± 0.1                                         | 0.9 ± 0.1                  |
| 2-Phenylethanol | 8.0 ± 0.4                                         | 6.3 ± 0.3                  |

689

690 **Table 2:** Lag-times ( $\lambda$ ), maximal OD<sub>600</sub> during stationary phase (OD<sub>600</sub><sup>max</sup>), and maximal growth  
 691 rates ( $\mu_{\max}$ ) of different *P. putida* strains during growth with M9 medium supplemented with 20  
 692 mM glycerol and 0  $\mu\text{M}$  or 10  $\mu\text{M}$  La<sup>3+</sup> incubated in microtiter plates at 30°C and 250 rpm (see  
 693 also Fig. 2 and Fig.5). Maximal growth rates and lag-times were determined by fitting growth  
 694 curves to the Richards model using “grofit” package in R (44). Cultures were incubated at 250  
 695 rpm and 30°C in microplate reader with constant OD<sub>600</sub> measurement. Data points represent  
 696 average of biological triplicates with corresponding error ( $\lambda$ ,  $\mu_{\max}$ ) or standard deviation  
 697 (OD<sub>600</sub><sup>max</sup>). No growth parameters could be determined for cultures that did not reach stationary  
 698 phase during incubation time (n. d.).  
 699

| Strain          | $\lambda$ [h]                    |                                   | OD <sub>600</sub> <sup>max</sup> |                                   | $\mu_{\max}$ [h <sup>-1</sup> ]  |                                   |
|-----------------|----------------------------------|-----------------------------------|----------------------------------|-----------------------------------|----------------------------------|-----------------------------------|
|                 | 0 $\mu\text{M}$ La <sup>3+</sup> | 10 $\mu\text{M}$ La <sup>3+</sup> | 0 $\mu\text{M}$ La <sup>3+</sup> | 10 $\mu\text{M}$ La <sup>3+</sup> | 0 $\mu\text{M}$ La <sup>3+</sup> | 10 $\mu\text{M}$ La <sup>3+</sup> |
| KT2440*         | 17.3 ± 0.2                       | 10.2 ± 0.2                        | 0.884 ± 0.004                    | 0.680 ± 0.014                     | 0.341 ±                          | 0.201 ± 0.004                     |
| $\Delta pedE$   | 17.5 ± 0.3                       | 17.2 ± 0.4                        | 0.869 ± 0.002                    | 0.802 ± 0.013                     | 0.276 ±                          | 0.291 ± 0.012                     |
| $\Delta garK$   | 17.1 ± 0.3                       | n.d.                              | 0.805 ± 0.005                    | n.d.                              | 0.321 ±                          | n.d.                              |
| $\Delta calA$   | 16.0 ± 0.3                       | 11.1 ± 0.3                        | 0.890 ± 0.004                    | 0.753 ± 0.006                     | 0.336 ±                          | 0.271 ± 0.008                     |
| $\Delta glcDEF$ | 17.0 ± 0.2                       | 10.1 ± 0.2                        | 0.862 ± 0.016                    | 0.678 ± 0.004                     | 0.315 ±                          | 0.207 ± 0.004                     |

700

701 **Table 3:** List of regulated proteins in presence of 10  $\mu\text{M}$   $\text{La}^{3+}$  compared to the absence of  
 702  $\text{La}^{3+}$  when grown with glycerol as sole C-source.  
 703

| <b>Locus Tag</b> | <b>Protein name</b> | <b>Fold change induction<br/>(log<sub>2</sub>)</b> | <b>- log<sub>10</sub>(p-value)</b> |
|------------------|---------------------|----------------------------------------------------|------------------------------------|
| PP_2426          | CalA                | 6.28                                               | 4.03                               |
| PP_2679          | PedH                | 4.75                                               | 3.80                               |
| PP_3426          | MexF                | 3.93                                               | 3.24                               |
| PP_3425          | MexE                | 3.74                                               | 2.18                               |
| PP_4921          |                     | 3.65                                               | 2.46                               |
| PP_2440          | AhpF                | 3.13                                               | 3.08                               |
| PP_3745          | GlcD                | 3.12                                               | 3.32                               |
| PP_3747          | GlcF                | 2.67                                               | 3.50                               |
| PP_3746          | GlcE                | 2.64                                               | 2.98                               |
| PP_4922          | ThiC                | 2.21                                               | 3.84                               |
| PP_3748          | GlcG                | 2.06                                               | 3.71                               |
| PP_3622          |                     | 1.97                                               | 2.82                               |
| PP_3178          | GarK                | 1.77                                               | 2.85                               |
| PP_3621          | IorA-II             | 1.60                                               | 2.34                               |
| PP_0554          | AcoB                | 1.54                                               | 2.27                               |
| PP_3623          | AdhB                | 1.54                                               | 3.67                               |
| PP_2484          |                     | 1.52                                               | 2.37                               |
| PP_0734          | HemK                | 1.51                                               | 2.67                               |
| PP_2439          | AhpC                | 1.39                                               | 2.02                               |
| PP_0556          |                     | 1.35                                               | 2.34                               |
| PP_1125          |                     | 1.30                                               | 3.01                               |
| PP_0555          | AcoA                | 1.20                                               | 2.52                               |
| PP_1548          |                     | 1.19                                               | 2.03                               |
| PP_1351          | PanE                | -1.45                                              | 2.06                               |
| PP_2258          |                     | -1.84                                              | 2.40                               |
| PP_5658          |                     | -1.99                                              | 2.93                               |
| PP_3557          |                     | -2.41                                              | 2.33                               |
| PP_3603          |                     | -2.46                                              | 2.73                               |
| PP_4313          |                     | -2.55                                              | 2.50                               |
| PP_0588          |                     | -2.75                                              | 2.62                               |
| PP_2674          | PedE                | -4.25                                              | 3.78                               |
| PP_2673          |                     | -5.37                                              | 3.71                               |
| PP_3732          |                     | -5.78                                              | 3.07                               |

704



705 **Table S1:** Strains and plasmids used in the study  
706

| Strains                                  | Relevant features                                                                                                                                                                                                                         | Source or reference |
|------------------------------------------|-------------------------------------------------------------------------------------------------------------------------------------------------------------------------------------------------------------------------------------------|---------------------|
| KT2440*                                  | KT2440 with a markerless deletion of <i>upp</i>   Parent strain for deletion mutants                                                                                                                                                      | (46)                |
| $\Delta pedE$                            | KT2440* with a markerless deletion of <i>pedE</i>                                                                                                                                                                                         | (11)                |
| $\Delta pedH$                            | KT2440* with a markerless deletion of <i>pedH</i>                                                                                                                                                                                         | (11)                |
| $\Delta calA$                            | KT2440* with a markerless deletion of <i>calA</i>                                                                                                                                                                                         | this study          |
| $\Delta garK$                            | KT2440* with a markerless deletion of gene <i>garK</i>                                                                                                                                                                                    | this study          |
| $\Delta glcDEF$                          | KT2440* with a markerless deletion of gene cluster <i>glcDEF</i>                                                                                                                                                                          | this study          |
| $\Delta pedE \Delta pedH$                | KT2440* with a markerless deletion of <i>pedE</i> and <i>pedH</i>                                                                                                                                                                         | (11)                |
| $\Delta pedE \Delta pedH \Delta glpFKRD$ | $\Delta pedE \Delta pedH$ with a markerless deletion of gene cluster $\Delta glpFKRD$                                                                                                                                                     | this study          |
| <i>E. coli</i> TOP10                     | <i>F</i> - <i>mcrA</i> $\Delta(mrr-hsdRMS-mcrBC)$ $\phi 80lacZ\Delta M15$ $\Delta lacX74$ <i>nupG</i> <i>recA1</i> <i>araD139</i> $\Delta(ara-leu)7697$ <i>galE15</i> <i>galK16</i> <i>rpsL(Str<sup>R</sup>)</i> <i>endA1</i> $\lambda^-$ | Invitrogen          |
| <b>Plasmids</b>                          |                                                                                                                                                                                                                                           |                     |
| pJOE6261.2                               | Suicide vector for gene deletions                                                                                                                                                                                                         | (46)                |
| pJOE-calA                                | pJOE6261.2 based deletion vector for gene <i>calA</i> (PP_2426)                                                                                                                                                                           | this study          |
| pJOE-garK                                | pJOE6261.2 based deletion vector for gene <i>garK</i> (PP_3178)                                                                                                                                                                           | this study          |
| pJOE-glp                                 | pJOE6261.2 based deletion vector for gene cluster <i>glpFKRD</i> (PP_1076 to PP_1073)                                                                                                                                                     | this study          |
| pMW08                                    | pJOE6261.2 based deletion vector for gene cluster <i>glcDEF</i> (PP_3745 to PP_3747)                                                                                                                                                      | this study          |

707

708 **Table S2:** Primers used in the study  
709

| <b>Primer</b> |                                         |                  |
|---------------|-----------------------------------------|------------------|
| <b>Name</b>   | <b>Sequence 5' → 3'</b>                 | <b>Annealing</b> |
| PcalA1        | CGATGGCCGCTTTGGTCCCGAGCCGTTCCACACTTTTCG | 67°C             |
| PcalA2        | AACCGATCAAGCAGGGCCTCGCAGTGAA            | 67°C             |
| PcalA3        | GAGGCCCTGCTTGATCGGTTGCCTGTACG           | 65°C             |
| PcalA4        | CCTGCAGGTCGACTCTAGAGCGTGGGTGAGCAAGGCAG  | 65°C             |
| PgarK1        | CGATGGCCGCTTTGGTCCCGAGTCGTTGCTGTGGTGCC  | 62°C             |
| PgarK2        | TACAGGGTGTGGGGTTTCTCCTGTCCTG            | 62°C             |
| PgarK3        | GAGAAACCCACACCCTGTAGAAATGGCCTTATTG      | 67°C             |
| PgarK4        | CCTGCAGGTCGACTCTAGAGCAGCGGCAAACCTGACCAT | 67°C             |
| Pglp1         | CGATGGCCGCTTTGGTCCCGGTCATCAATAAAGGTCCG  | 55°C             |
| Pglp2         | ACCGTAGGTAGTATGACCTCGTTTTTTTTTG         | 55°C             |
| Pglp3         | GAGGTCATACTACCTACGGTGAAGCCCTC           | 62°C             |
| Pglp4         | CCTGCAGGTCGACTCTAGAGGTTGTGAAGACCGCCTGC  | 62°C             |
| MWH03         | AGGCACGATGGCCGCTTTGGTCCCGGCCTGCTCGGGC   | 63°C             |
| MWH04         | GCTAAGCATGGGCCATCGGCTCACTCGCAAC         | 63°C             |
| MWH05         | AGTGAGCCGATGGCCCATGCTTAGCAAGTTCGTTATCG  | 63°C             |
| MWH06         | GCATGCCTGCAGGTCGACTCTAGAGCCAGGGCAATGCG  | 63°C             |

710

711 **Table S3:** List of regulated proteins in presence of 10  $\mu\text{M}$   $\text{La}^{3+}$  compared to the absence of  
712  $\text{La}^{3+}$  when grown with 2-phenylethanol as sole C-source.  
713

| <b>Locus Tag</b> | <b>Protein name</b> | <b>Fold change induction<br/>(log<sub>2</sub>)</b> | <b>- log<sub>10</sub>(p-value)</b> |
|------------------|---------------------|----------------------------------------------------|------------------------------------|
| PP_2679          | PedH                | 3.41                                               | 2.48                               |
| PP_3357          | Vdh                 | 2.65                                               | 2.92                               |
| PP_5125          | MutM                | 2.24                                               | 3.15                               |
| PP_4905          | MotA                | 1.84                                               | 2.01                               |
| PP_0091          |                     | 1.71                                               | 2.26                               |
| PP_5157          |                     | 1.59                                               | 2.20                               |
| PP_0342          | WaaC                | 1.43                                               | 2.46                               |
| PP_3722          | Alr                 | 1.04                                               | 2.40                               |
| PP_2674          | PedE                | -1.49                                              | 5.90                               |
| PP_2673          |                     | -2.41                                              | 3.91                               |

714

715 **Table S4:** List of regulated proteins in presence of 10  $\mu\text{M}$   $\text{La}^{3+}$  compared to the absence of  
716  $\text{La}^{3+}$  when grown with glucose as sole C-source.  
717

| Locus Tag | Protein name | Fold change induction<br>( $\log_2$ ) | $-\log_{10}(p\text{-value})$ |
|-----------|--------------|---------------------------------------|------------------------------|
| PP_2679   | PedH         | 4.35                                  | 3.17                         |
| PP_4508   |              | 1.74                                  | 2.97                         |
| PP_3713   | CatA         | 1.44                                  | 2.43                         |
| PP_5221   |              | 1.39                                  | 2.21                         |
| PP_0367   |              | 1.27                                  | 2.47                         |
| PP_4796   | HolA         | -1.30                                 | 2.15                         |
| PP_4374   | FliT         | -1.95                                 | 2.45                         |
| PP_2666   |              | -2.01                                 | 2.51                         |
| PP_3951   | PcaI         | -2.13                                 | 2.68                         |
| PP_2680   | AldB-II      | -2.79                                 | 2.41                         |
| PP_4632   | FoIM         | -3.54                                 | 2.53                         |
| PP_2662   |              | -3.61                                 | 3.62                         |
| PP_1757   | BoIA         | -3.64                                 | 3.99                         |
| PP_2674   | PedE         | -6.97                                 | 4.13                         |

718

719 **Table S5:** List of regulated proteins in presence of 10  $\mu\text{M}$   $\text{La}^{3+}$  compared to the absence of  
720  $\text{La}^{3+}$  when grown with citrate as sole C-source.

721

| <b>Locus Tag</b> | <b>Protein name</b> | <b>Fold change induction<br/>(log<sub>2</sub>)</b> | <b>- log<sub>10</sub>(p-value)</b> |
|------------------|---------------------|----------------------------------------------------|------------------------------------|
| PP_2491          |                     | 2.27                                               | 4.32                               |
| PP_0365          | BioC                | 1.12                                               | 2.06                               |
| PP_4157          | KdpE                | -1.41                                              | 2.72                               |
| PP_2674          | PedE                | -2.56                                              | 2.80                               |
| PP_0634          | PilA                | -3.08                                              | 3.88                               |

722

723 **Figures**

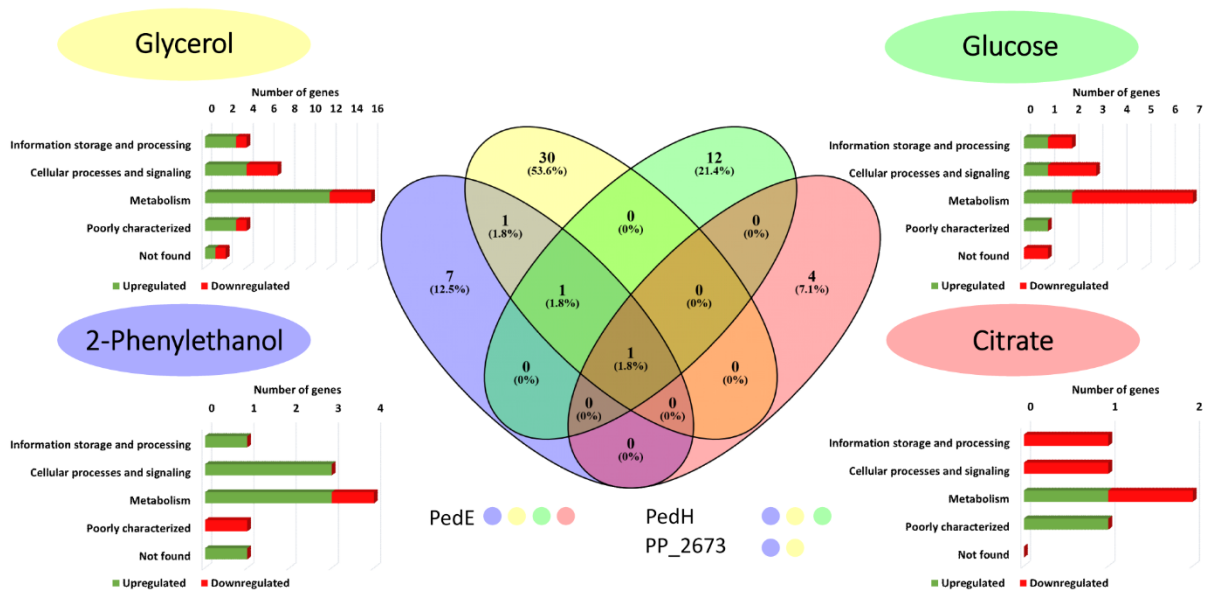

724  
725

726 **Figure 1:** Venn-diagram (middle) of differentially produced proteins in response to 10  $\mu\text{M}$   $\text{La}^{3+}$   
727 during growth with glycerol, glucose, 2-phenylethanol and citrate. Proteins that showed up  
728 under several growth conditions are stated under the diagram with colour code for classification  
729 (yellow dot = glycerol; green dot = glucose; blue dot = 2-phenylethanol; red dot = citrate).  
730 Classifications of differentially expressed proteins according to the Cluster of Orthologous  
731 Groups database are depicted for each substrate.  
732

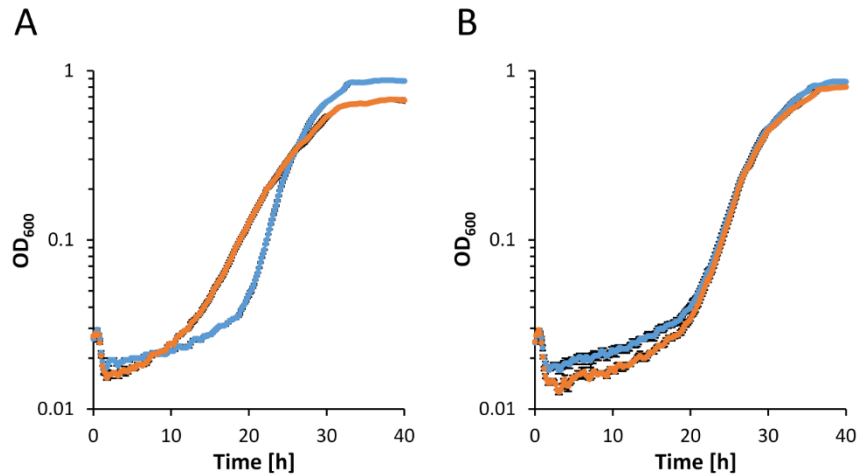

733

734

735

736

737

738

739

**Figure 2:** Growth of strains (A) KT2440\* and (B)  $\Delta pedE \Delta pedH$  in M9 minimal medium supplemented with 20 mM glycerol in the absence (blue dots) or presence of 10  $\mu\text{M}$   $\text{La}^{3+}$  (orange dots) in 96-well microtiter plates at 30°C and 250 rpm. Data represent average of biological triplicates with corresponding standard deviation.

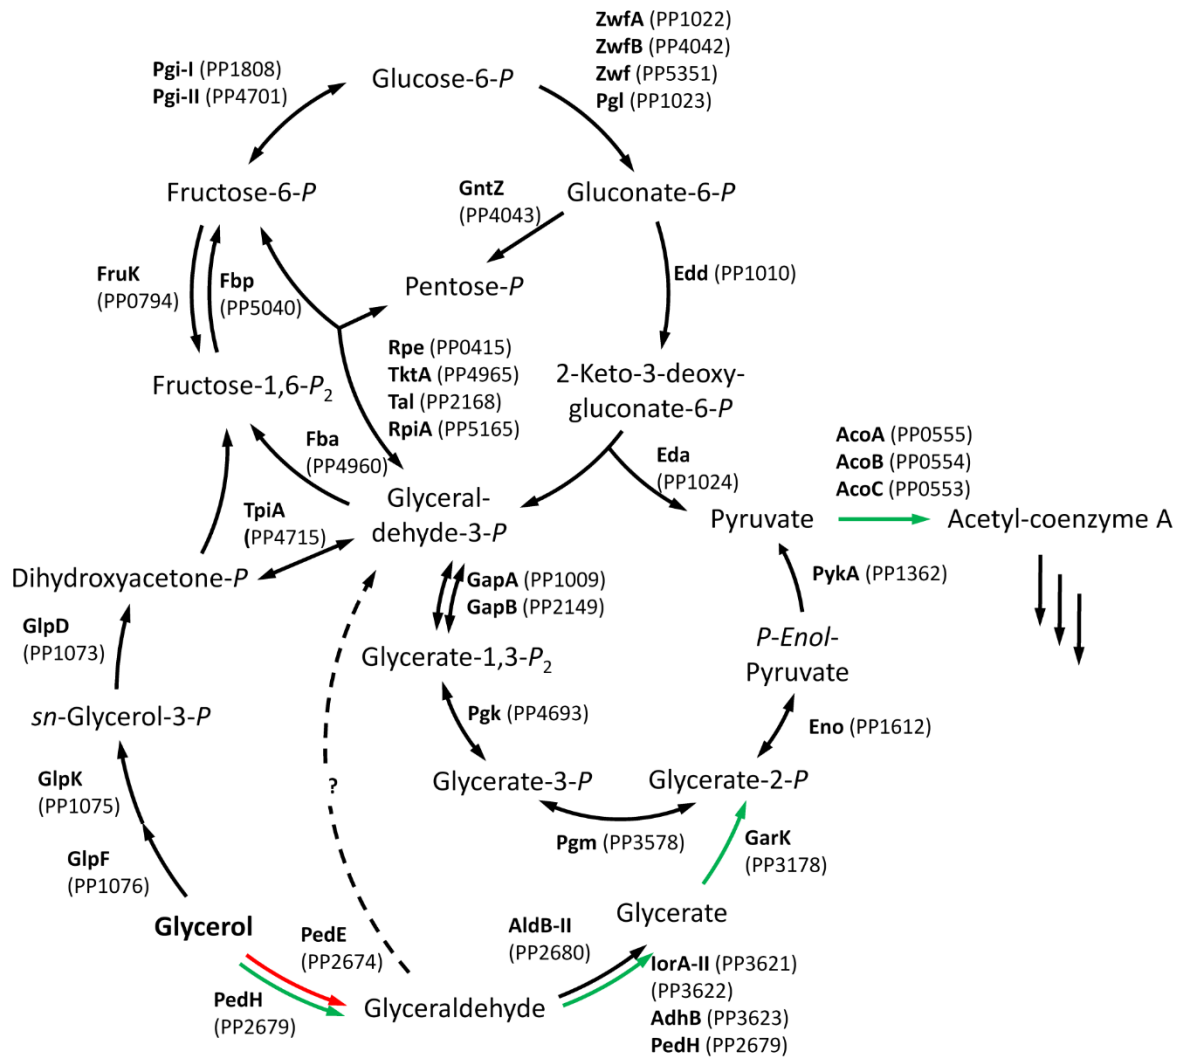

740

741

742 **Figure 3:** Proteins of the upstream central carbon metabolism of *P. putida* KT2440 including  
 743 the proposed glycerol degradation pathway via glycerate and the additional hypothetical route  
 744 through phosphorylation of glyceraldehyde (dotted line). Anticipated metabolic flux by the  
 745 proteins that were identified as differentially abundant in response to 10  $\mu$ M  $\text{La}^{3+}$  during growth  
 746 on glycerol are colour-coded (green = increased, red = decreased, black = not affected). The  
 747 figure is inspired by a scheme originally published by Nikel *et al.* (58) and was adapted to  
 748 include the novel metabolic route(s) identified in this study.

749



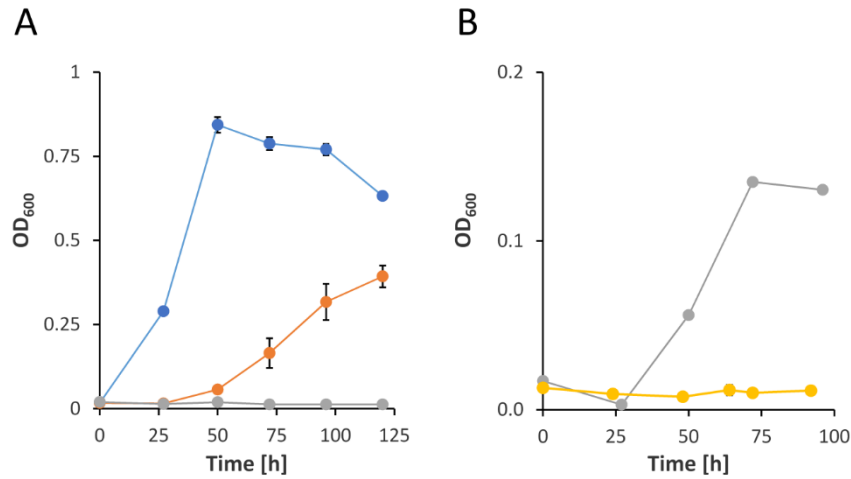

750  
751

752 **Figure 4:** (A) Growth of strains  $\Delta pedE \Delta pedH$  (blue dots),  $\Delta glpFKRD$  (orange dots), and  
753  $\Delta pedE \Delta pedH \Delta glpFKRD$  (grey dots) in M9 minimal medium supplemented with 20 mM  
754 glycerol in 96-well microtiter plates. (B) Growth of strains  $\Delta pedE \Delta pedH \Delta glpFKRD$  (grey dots)  
755 and  $\Delta garK$  (yellow dots), in M9 minimal medium supplemented with 20 mM DL-glycerate  
756 incubated in 96-well microtiter plates at 28°C and 220 rpm. Data represent average of  
757 biological triplicates with corresponding standard deviation.

758

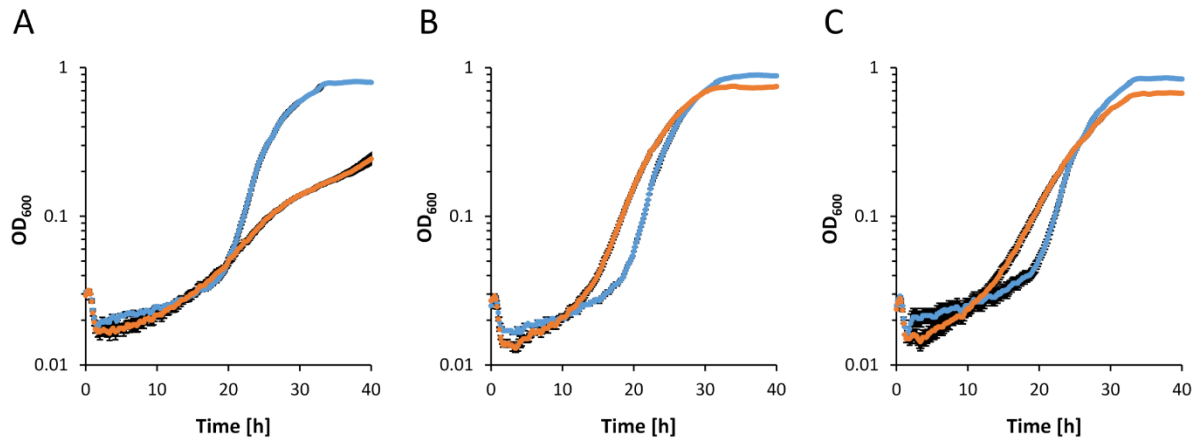

759  
760

761 **Figure 5:** Growth of strains (A)  $\Delta garK$ , (B)  $\Delta calA$ , and (C)  $\Delta glcDEF$  in M9 minimal medium  
762 supplemented with 20 mM glycerol in absence (blue dots) or presence 10  $\mu M$  La<sup>3+</sup> (orange  
763 dots) incubated in 96-well microtiter plates at 30°C and 250 rpm. Data represent average of  
764 biological triplicates with corresponding standard deviation.  
765

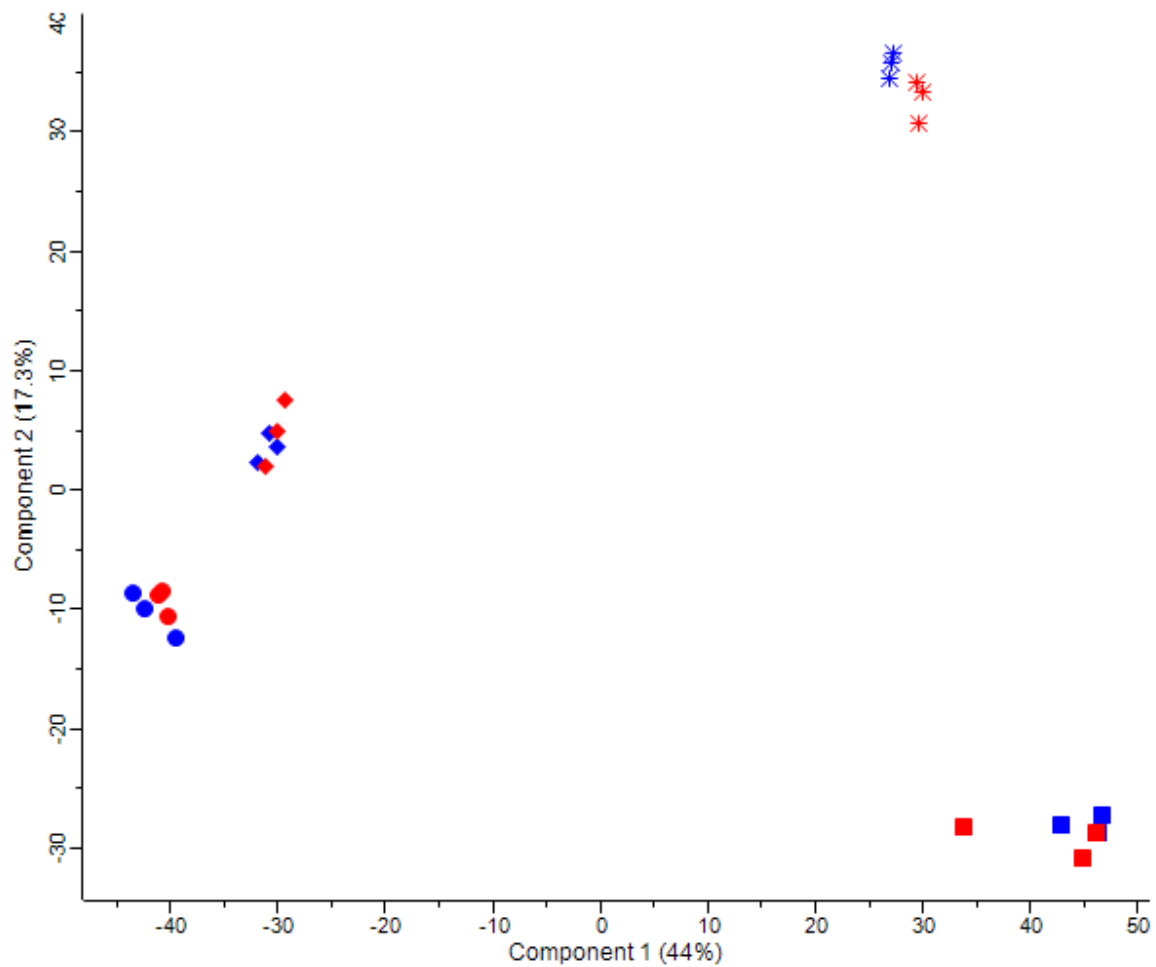

766

767 **Figure S1: PCA comparing the four different carbon sources with and without La<sup>3+</sup>.**

768 Different carbon sources are indicated by squares (2-phenylethanol), circles (citrate),

769 diamonds (glucose) and stars (glycerol). Samples with 10 μM La<sup>3+</sup> or without La<sup>3+</sup> in the

770 medium are shown in blue and red, respectively. Biological replicates are indicated in the same

771 colour. Samples can be separated according to different carbon sources while treatment with

772 La<sup>3+</sup> only showed minor effects.
